# Supplementary material for: Investigating the limiting aircraft design-dependent and environmental factors of persistent contrail formation
Source: Copernicus journal article supplement (doi:10.5194/egusphere-2024-3398), 2024-11-14
Supplement: Supplementary file 1 [file egusphere-2024-3398-supplement.pdf]

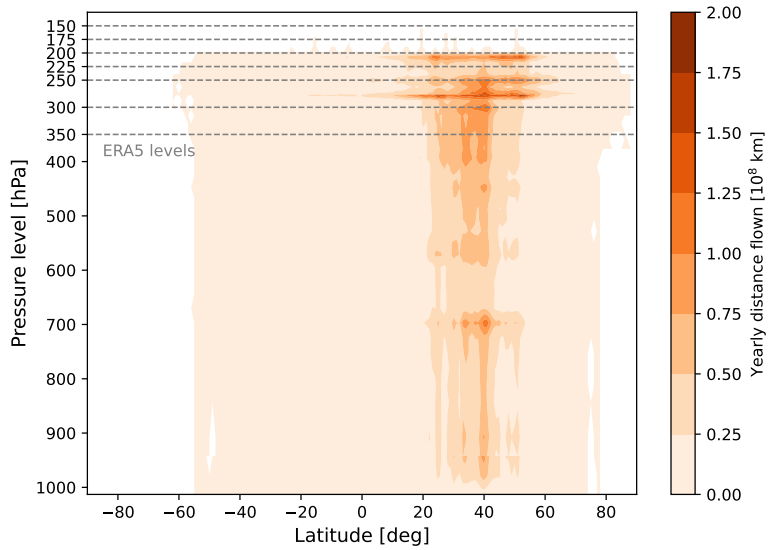

**Supplementary Figure 1.** DEPA 2050 progressive scenario for the year 2050 used to weight the potential persistent contrail formation. Also shown are the ERA5 pressure levels considered in the study.

**Supplementary Table 1.** Percentage changes in potential persistent contrail formation  $p_{pcf}$  and DEPA 2050 distance-weighted  $p_{pcf}$  for the pressure levels 300 and 250 hPa and all considered pressure levels, averaged over four latitude bands: the southern extratropics (xtropS), tropics (trop), northern extratropics (xtropN) and all latitudes. The full data is available within the linked dataset.

| Pressure level |         | Unweighted |          |         |         | Weighted |          |         |         |
|----------------|---------|------------|----------|---------|---------|----------|----------|---------|---------|
|                |         | xtropS     | trop     | xtropN  | Global  | xtropS   | trop     | xtropN  | Global  |
| WET-75         | 300 hPa | 47.9 %     | 0 %      | 28.1 %  | 38.9 %  | 2.3 %    | 0 %      | 11.6 %  | 11.5 %  |
|                | 250 hPa | 59.2 %     | 0 %      | 35.3 %  | 47.2 %  | 4.7 %    | 0 %      | 18.3 %  | 17.4 %  |
|                | All     | 58.1 %     | 34.5 %   | 34.7 %  | 44.9 %  | 9.3 %    | 1.1 %    | 19.0 %  | 16.3 %  |
| WET-50         | 300 hPa | 80.2 %     | 0.3 %    | 64.4 %  | 73.0 %  | 22.6 %   | 0.5 %    | 46.5 %  | 46.2 %  |
|                | 250 hPa | 83.2 %     | 5.0 %    | 74.5 %  | 77.5 %  | 34.3 %   | 6.9 %    | 59.7 %  | 57.3 %  |
|                | All     | 84.5 %     | 67.2 %   | 73.2 %  | 76.6 %  | 48.4 %   | 23.9 %   | 57.8 %  | 52.8 %  |
| HYB-80         | 300 hPa | 87.1 %     | 3.4 %    | 76.0 %  | 82.1 %  | 38.4 %   | 4.5 %    | 61.4 %  | 61.1 %  |
|                | 250 hPa | 89.6 %     | 16.9 %   | 84.7 %  | 85.7 %  | 52.8 %   | 20.4 %   | 73.9 %  | 71.6 %  |
|                | All     | 90.5 %     | 76.8 %   | 82.8 %  | 84.6 %  | 62.8 %   | 46.5 %   | 71.1 %  | 67.4 %  |
| CON-LG         | 300 hPa | 100 %      | 100 %    | 100 %   | 100 %   | 100 %    | 100 %    | 100 %   | 100 %   |
|                | 250 hPa | 100 %      | 100 %    | 100 %   | 100 %   | 100 %    | 100 %    | 100 %   | 100 %   |
|                | All     | 100 %      | 100 %    | 100 %   | 100 %   | 100 %    | 100 %    | 100 %   | 100 %   |
| CON-NG         | 300 hPa | 105.3 %    | 314.8 %  | 109.0 % | 107.1 % | 144.9 %  | 298.5 %  | 119.8 % | 120.3 % |
|                | 250 hPa | 103.1 %    | 179.1 %  | 104.7 % | 105.5 % | 120.0 %  | 169.8 %  | 109.1 % | 111.6 % |
|                | All     | 103.3 %    | 107.9 %  | 106.5 % | 105.5 % | 120.0 %  | 117.6 %  | 113.1 % | 113.8 % |
| H2C-04         | 300 hPa | 121.9 %    | 7136.0 % | 133.9 % | 129.4 % | 407.0 %  | 5163.1 % | 196.0 % | 206.0 % |
|                | 250 hPa | 107.2 %    | 1788.8 % | 114.6 % | 149.4 % | 153.8 %  | 1135.5 % | 129.9 % | 171.6 % |
|                | All     | 111.6 %    | 153.6 %  | 122.9 % | 125.7 % | 201.9 %  | 252.8 %  | 157.5 % | 171.4 % |

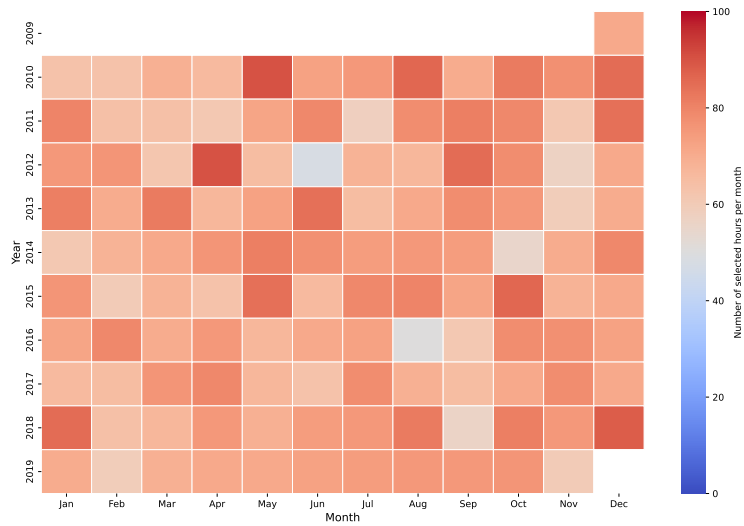

**Supplementary Figure 2.** Number of hours randomly selected in ERA5 within the 2010 decade.

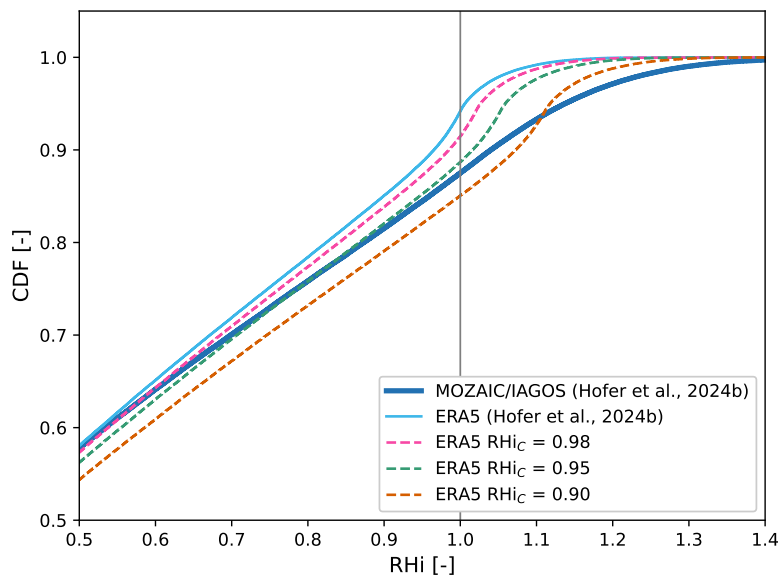

**Supplementary Figure 3.** Comparison of the cumulative distribution functions of ERA5 and MOZAIC/IAGOS from (Hofer et al., 2024). We enhance the ERA5 relative humidity by applying simple factors and find that  $RH_{iC} = 0.95$  provides a good fit against MOZAIC/IAGOS data for  $RHi \leq 1.0$ .

## References

Hofer, S., Gierens, K., and Rohs, S.: How Well Can Persistent Contrails Be Predicted? An Update, *Atmospheric Chemistry and Physics*, 24, 7911–7925, <https://doi.org/10.5194/acp-24-7911-2024>, 2024.

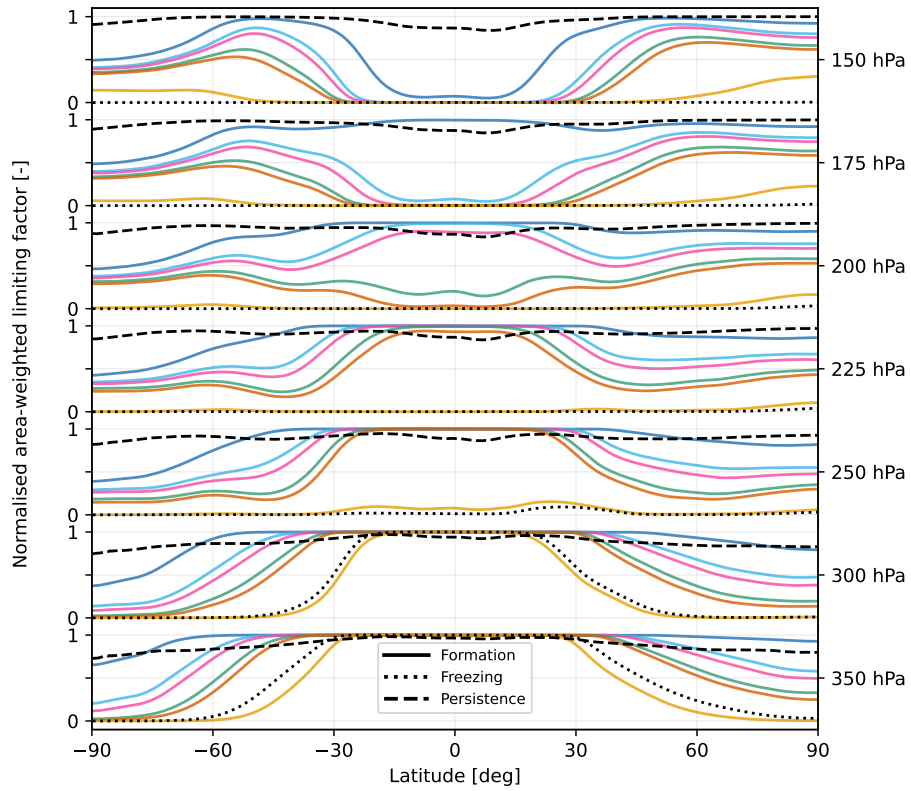

**Supplementary Figure 4.** Normalised and area-weighted limiting factors as a function of latitude (x-axis) and altitude (secondary y-axis). A normalised frequency of 0 would mean that the factor never limits persistent contrail formation; 1 that it always does. Freezing (dotted lines) and persistence (dashed lines) are independent of aircraft design. Formation is dependent on aircraft design and shown for the different designs (colours).

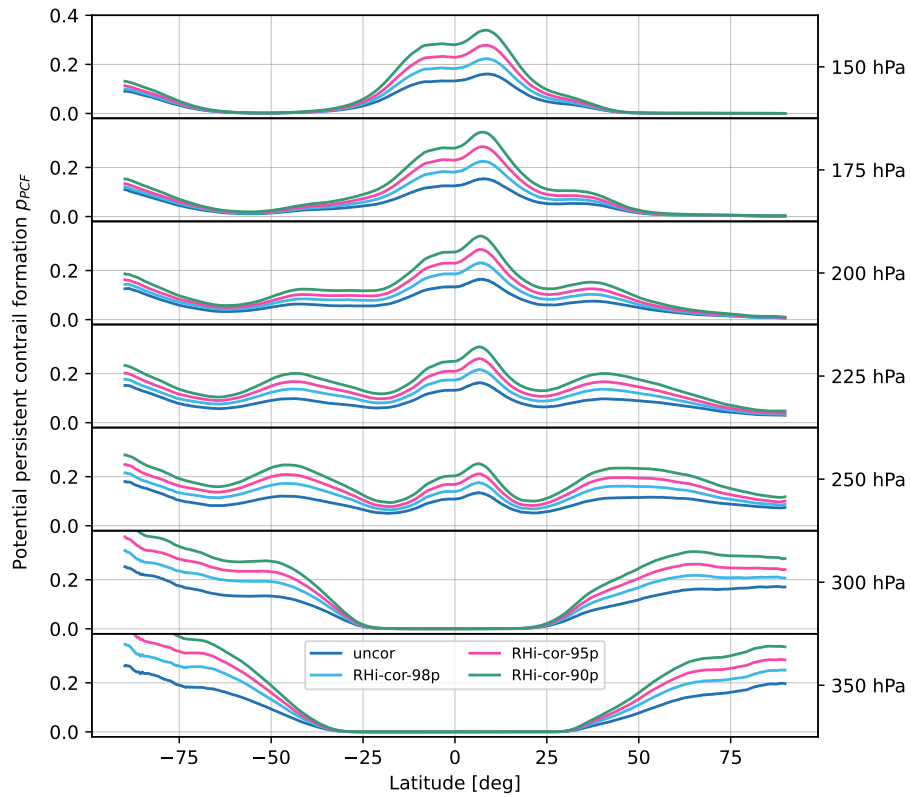

**Supplementary Figure 5.** Potential persistent contrail formation as a function of latitude (x-axis) and altitude (secondary y-axis) for different relative humidity enhancements.

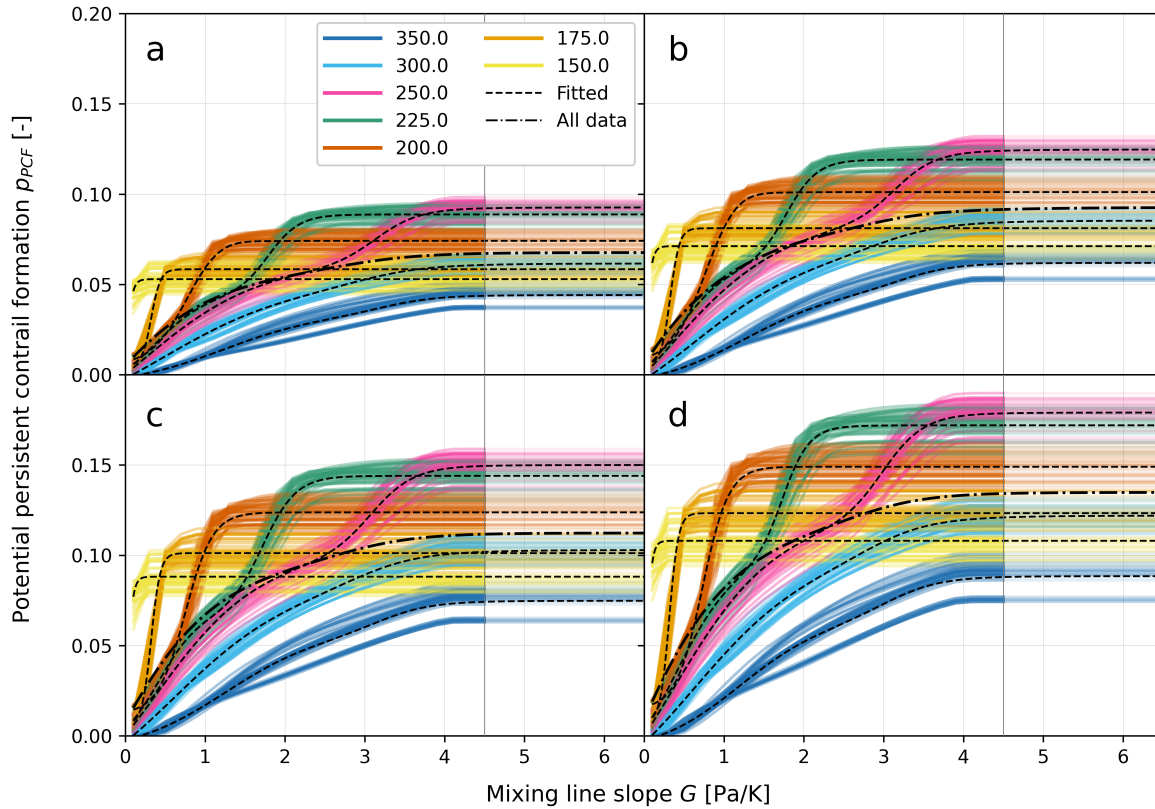

**Supplementary Figure 6.** Potential persistent contrail formation  $p_{pcf}$  as a function of the mixing line slope  $G$  on a climatological timescale for pressure levels 350 to 150 hPa. We enhance the relative humidity by applying simple factors  $1/RH_{iC}$ : **(a)** no correction, **(b)**  $RH_{iC} = 98\%$ , **(c)**  $RH_{iC} = 95\%$ , **(d)**  $RH_{iC} = 90\%$ . Each coloured line corresponds to a single season within the 2010 decade. The dashed lines are the fitted responses using a modified logistic function, for each pressure level individually ("fitted") and for all pressure levels together ("all data"). The faded part for  $G > 4.33$  Pa/K represents where the data was extended to improve the accuracy of the fits. The markers show at which value of  $G$  the corresponding  $p_{pcf}$  reaches within 1% of the supremum.
